# Supplementary material for: Au–Pd alloy catalyst with high performance for hydrogen generation from formic acid-formate solution at nearly 0 °C
Source: Royal Society of Chemistry journal article supplement (doi:10.1039/c4ra08389j), 2014-01-01
Supplement: c4ra08389j1.pdf [file c4ra08389j1.pdf]

# Supporting Information

## I. Reagents

Tetrachloroauric (III) acid (Aladdin , 99.99% , Shanghai)

Sodium tetrachloropalladate(II) (Aladdin ,98%, Shanghai)

sodium borohydride ( $\text{NaBH}_4$  , Aladdin , 98%, Shanghai)

Formic acid ( $\text{HCOOH}$ , FA, Aladdin , 98%, Shanghai)

Sodium formate (Aladdin , 96% , Shanghai)

Ethanol (Tianjin Chemical Reagents,>98% ,China)

De-ionized water

All the chemicals were used as received without further purification.

## II. Preparation of Catalyst

The synthesis of catalysts was carried out in ice-water bath (nearly 0 °C,denoted as L-Au<sub>6</sub>Pd<sub>4</sub>) or in water bath (25 °C, denoted as R-Au<sub>6</sub>Pd<sub>4</sub>). Typically, 167 mg carbon (VXC-72) was dispersed into 10 ml distilled water, sonicated for 3 h. 5 ml aqueous solution (containing 0.018 mmol  $\text{HAuCl}_4$  and 0.012 mmol  $\text{Na}_2\text{PdCl}_4$ ) was added and stirred for 30 min. Then, 10 ml fresh  $\text{NaBH}_4$  aqueous solution (containing 0.1g  $\text{NaBH}_4$ ) was added into above mixture with magnetic stirring (800 r/min). After reduction for 5 h, the catalyst was separated by centrifugation, washed with distilled water and ethanol for several times respectively and dried in vacuum oven for 24 h at 25 °C. Catalysts with different Au-Pd ratios were synthesized with solution containing different concentration of  $\text{HAuCl}_4$  and  $\text{Na}_2\text{PdCl}_4$ .

The preparation of catalysts and catalytic reactions were repeated for several times and the results were repeatable.

## III. Characterization of Catalysts

Powder X-ray diffraction (XRD) patterns were recorded using a Bruker diffractometer with Cu K  $\alpha$  radiation (D8 Advance X-ray diffractometer, Cu K  $\alpha$ ,  $\lambda=1.5406 \text{ \AA}$  40 kV and 40 m A). The composition of the catalysts was measured by inductively coupled plasma-atomic emission spectrometer (ICP-AES, USA Thermo Jarrell-Ash Corp. ICP-9000 (N+M)). Field-emission electron microscopy (TEM), energy-dispersive X-ray spectrometry (EDS) and EELS elemental mapping observations were performed on a Philips Tecnai F20 microscope, working at 200 kV. All samples subjected to TEM measurements were dispersed in ethanol ultrasonically and were dropped on nickel grids. Concentration of  $\text{H}_2$ ,  $\text{CO}_2$  and CO was measured on SP-2100A GC with thermal conductivity detector (TCD) and flame ionization detector (FID)-Methanator.

## IV. $\text{H}_2$ generation from FA/SF aqueous solution

Generally, 138 mg as-prepared catalyst was placed in a two-neck round bottom flask with one opening connected to gas burette and the other one connected to a pressure-equalization funnel. 10 ml formic acid ( $1.1 \text{ mol}\cdot\text{L}^{-1}$ ) and sodium formate ( $0.8 \text{ mol}\cdot\text{L}^{-1}$ ) aqueous solution was added into the flask through the funnel under magnetic stirring ( $800 \text{ r}\cdot\text{min}^{-1}$ ). Hydrogen generation started once the solution is added. The reaction was carried out in water bath ( $25 \text{ }^\circ\text{C}$ ) or ice-water bath (nearly  $0 \text{ }^\circ\text{C}$ ) respectively.

## V.

**Table S1** Activity for dehydrogenation of formic acid of various catalysts

| Catalyst                                 | Solvent/Medium           | Temp. (°C) | TOF (h <sup>-1</sup> ) | Ref       |
|------------------------------------------|--------------------------|------------|------------------------|-----------|
| Au-Pd/C                                  | Aqueous HCOONa           | 25         | 1075                   | This work |
|                                          |                          | 0          | 635                    |           |
| Au/ZrO <sub>2</sub> NC <sub>S</sub>      | 5HCOOH/2NEt <sub>3</sub> | 50         | 1593                   | 9         |
|                                          |                          | 25         | 292                    | 9         |
| Ag@Pd/C                                  | Aqueous                  | 20         | 192                    | 43        |
| CoAuPd /C                                | Aqueous                  | 25         | 80                     | 30        |
| Pd/C with citric acid                    | Aqueous HCOONa           | 25         | 64                     | 20        |
| Pd-Au/C-CeO <sub>2</sub>                 | Aqueous HCOONa           | 92         | 113.5                  | 35        |
| PdAu @ Au/C                              | Aqueous HCOONa           | 92         | 21.4                   | 38        |
| AuPd@ED-MIL-101                          | Aqueous HCOONa           | 90         | 106                    | 40        |
| Pd/MSC-30                                | Aqueous HCOONa           | 50         | 2623                   | 26        |
|                                          |                          | 25         | 750                    | 26        |
| Ag <sub>0.1</sub> Pd <sub>0.9</sub> /rGO | Aqueous HCOONa           | 25         | 105.2                  | 42        |
| Au@Pd-N-mrGO                             | Aqueous                  | 25         | 89.1                   | 44        |
| Pd-poly(allyl-amine)                     | Aqueous                  | 22         | 46.1                   | 25        |
| PdNi@Pd/GNs-CB                           | Aqueous HCOONa           | 25         | 577                    | 36        |
| PdNi /GNs-CB                             | Aqueous HCOONa           | 25         | 529                    | 36        |
| B-Pd/C                                   | Aqueous HCOONa           | 30         | 1184                   | 33        |

**VI.****Table S2** Activation energy for dehydrogenation of formic acid

| Catalyst                          | E <sub>a</sub> (KJ/mol) | Ref       |
|-----------------------------------|-------------------------|-----------|
| L-Au <sub>6</sub> Pd <sub>4</sub> | 21.98                   | This work |
| Au-ZrO <sub>2</sub>               | 49.3                    | 19        |
| PdAg/C                            | 115                     | 35        |
| PdAu/C                            | 115                     | 35        |
| Pd-Au/C-CeO <sub>2</sub>          | 84.2±7.4                | 34        |
| 1 wt% Au/TiO <sub>2</sub>         | 63                      | 15        |
| 0.8wt% Au/C                       | 55                      | 15        |
| 1wt% Pd/C                         | 65                      | 15        |
| 1 wt %Pd/C with 2wt% K            | 97                      | 24        |
| PtRuBiOx                          | 37                      | 28        |
| Ag@Pd                             | 30                      | 43        |
| AgPd                              | 22                      | 45        |
| Pd-MCM-30                         | 39                      | 26        |
| 2wt%Pt/Norit                      | 70±3                    | 27        |

**VII.****Table S3** Content of Au and Pd in L-Au<sub>6</sub>Pd<sub>4</sub> catalyst

| Method | Au            | Pd            |
|--------|---------------|---------------|
| ICP    | 1.44 (wt, %)  | 0.54 (wt, %)  |
| EDS    | 67.206(mol,%) | 32.793(mol,%) |

VIII.

Figure S1 TEM images of R-Au<sub>6</sub>Pd<sub>4</sub>

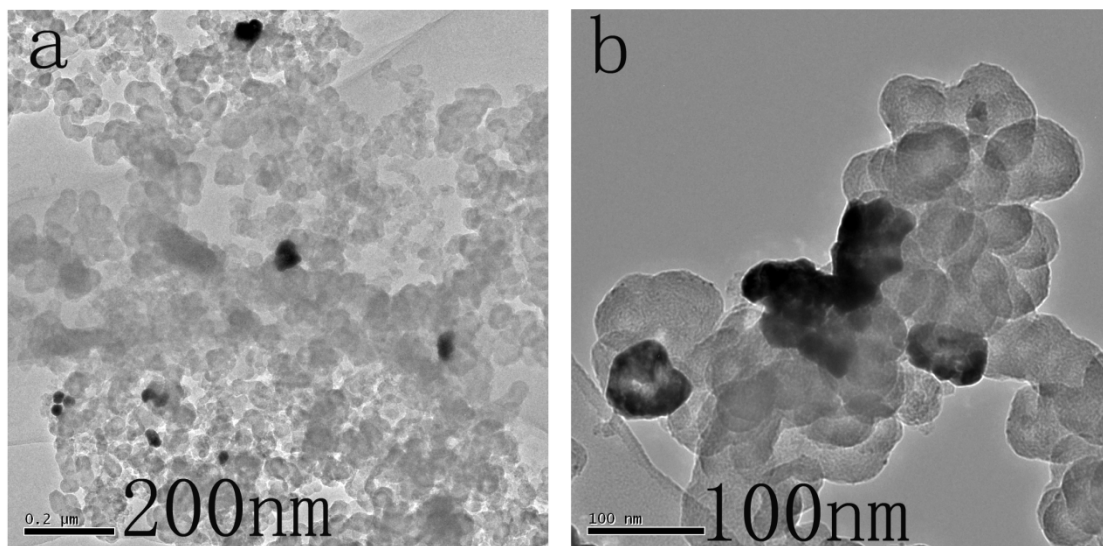

IX.

FigureS2 EDS image of L-Au<sub>6</sub>Pd<sub>4</sub>

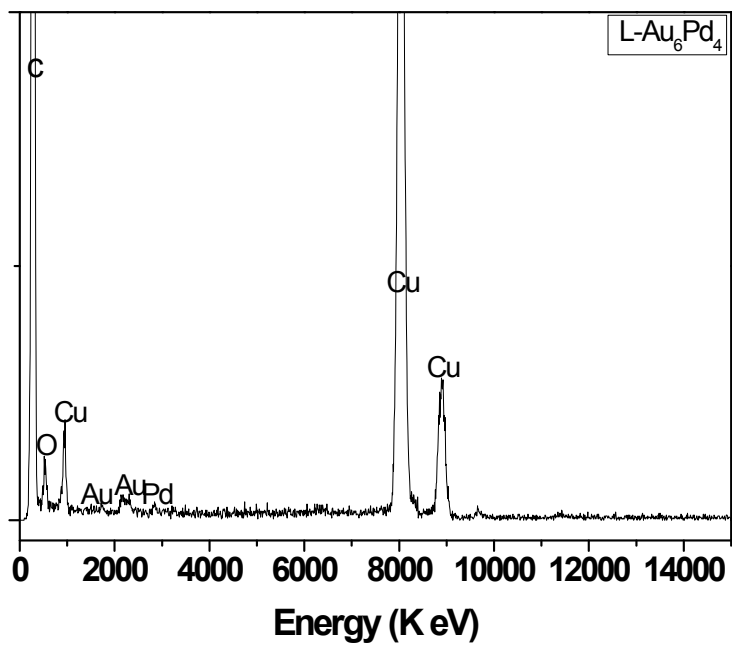

X.

Figure S3 H<sub>2</sub> generation with R-Au<sub>6</sub>Pd<sub>4</sub> at 0 °C from FA/SF (1.1M FA,4.0MSF)

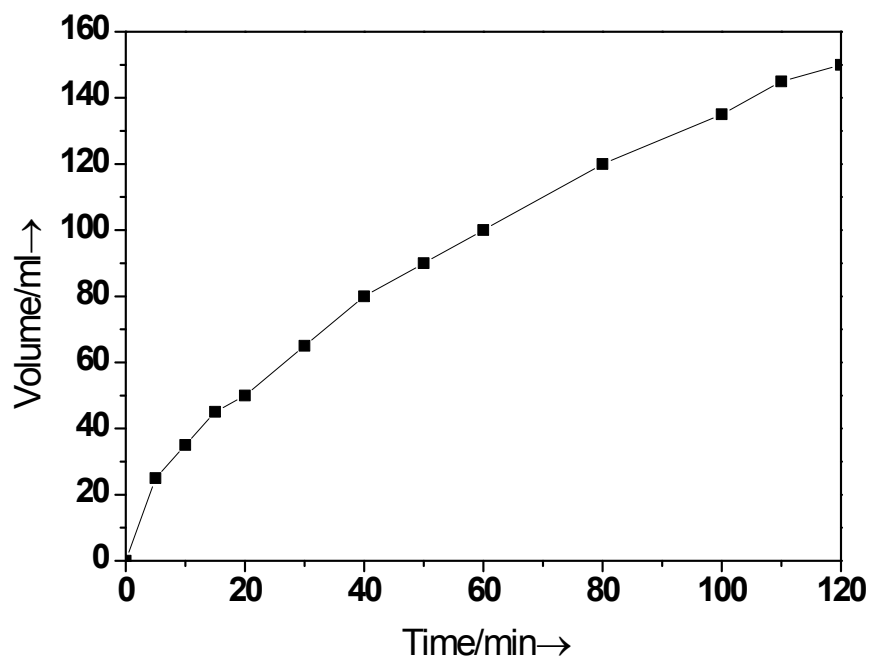

XI.



**Figure S4** Gas generation by the decomposition of FA/SF (2.2 M FA, 1.6 M SF) solution with L-Au<sub>6</sub>Pd<sub>4</sub> at nearly 0 °C for 700 min

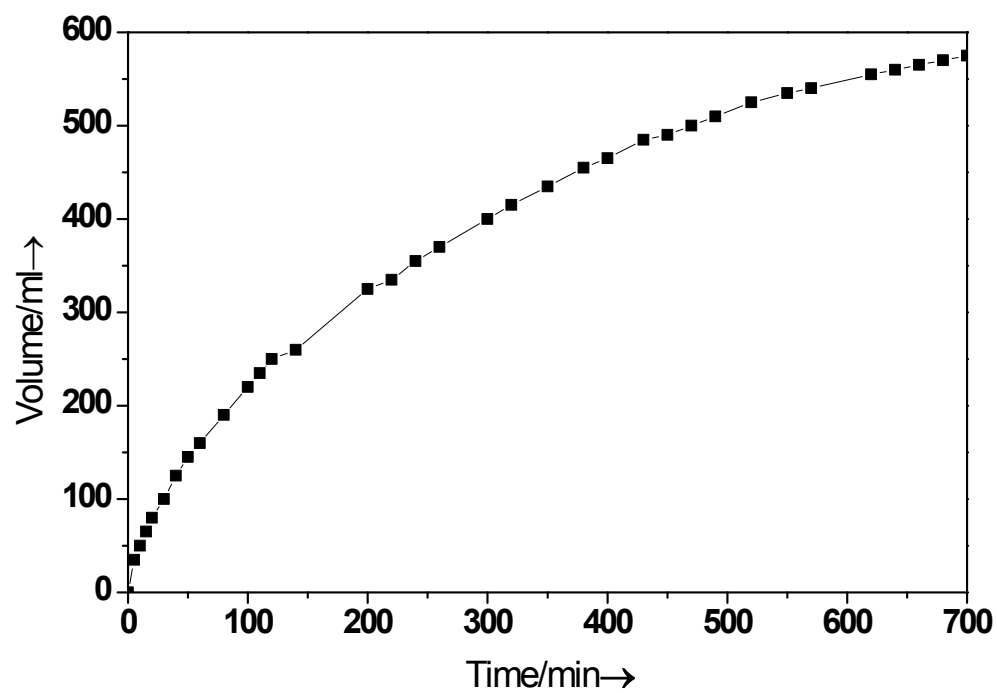

## XII.

**Figure S5** Gas generation and (b) initial TOF of the decomposition of FA/SF (1.1 M FA, 4.0 M SF) solution in present of L-Au<sub>x</sub>Pd<sub>(1-x)</sub> catalysts with different x value at nearly 0 °C.

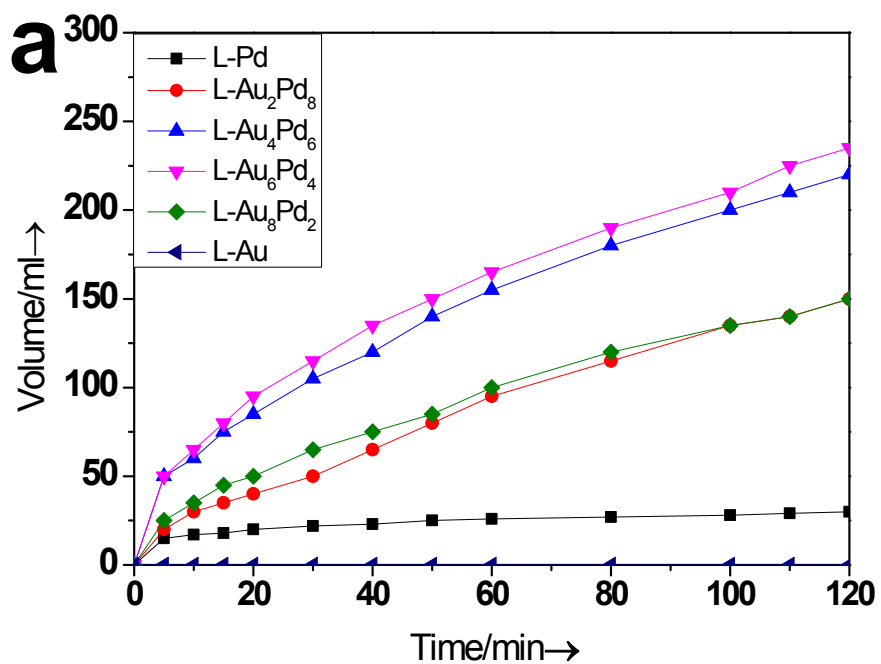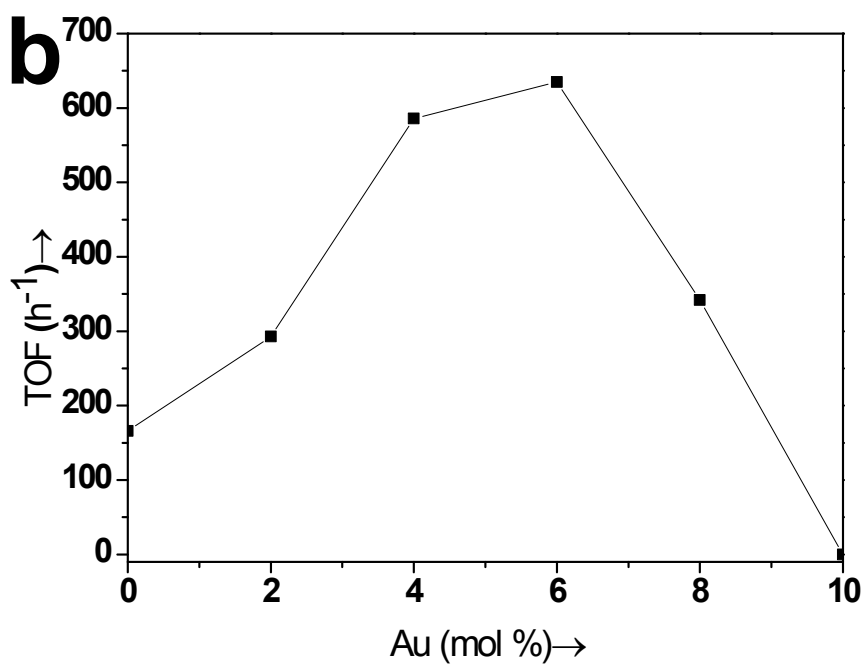

### XIII.

Figure S6 (a) Initial TOF and (b) activity of L-Au<sub>6</sub>Pd<sub>4</sub> at different temperatures

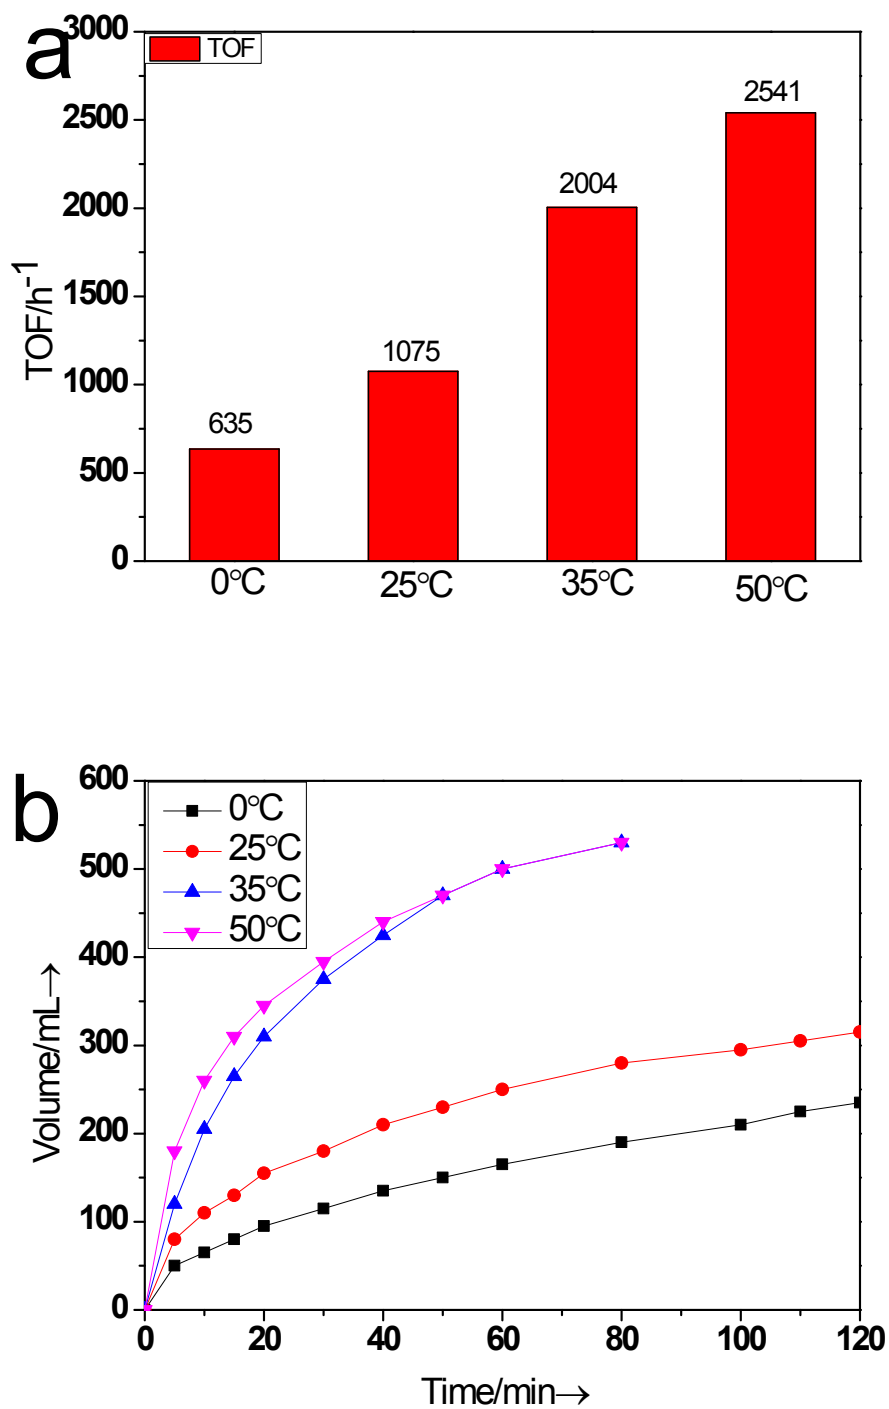

XIV.

Figure S7 Arrhenius plot (ln TOF vs 1/T)

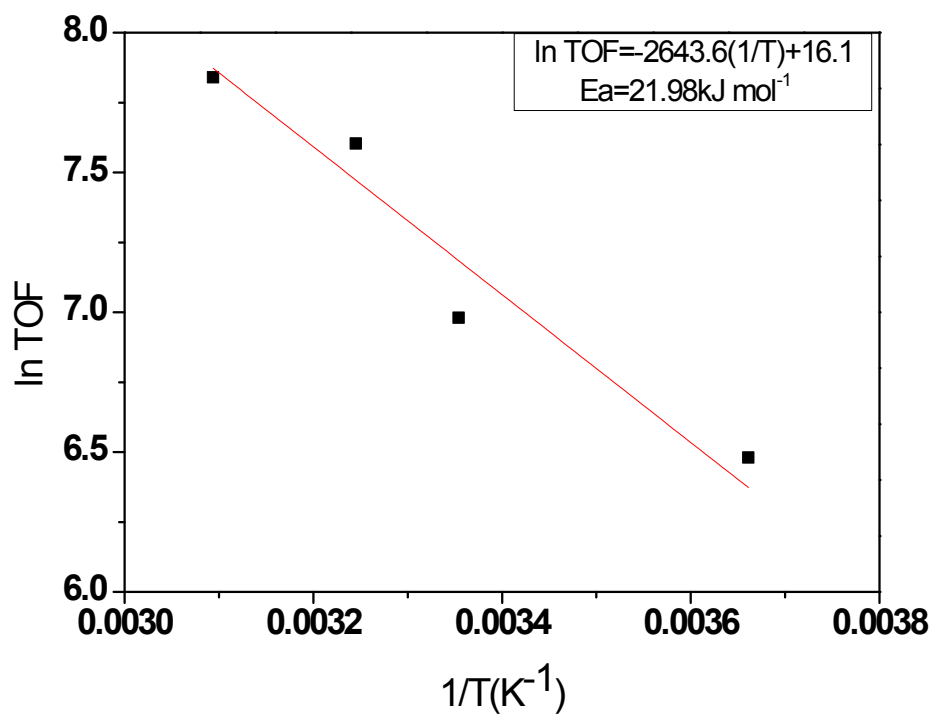

**XV.**

**Figure S8** GC spectrum using TCD for the gas generated from FA/SF solution (1.1 M FA, 4.0 M SF)

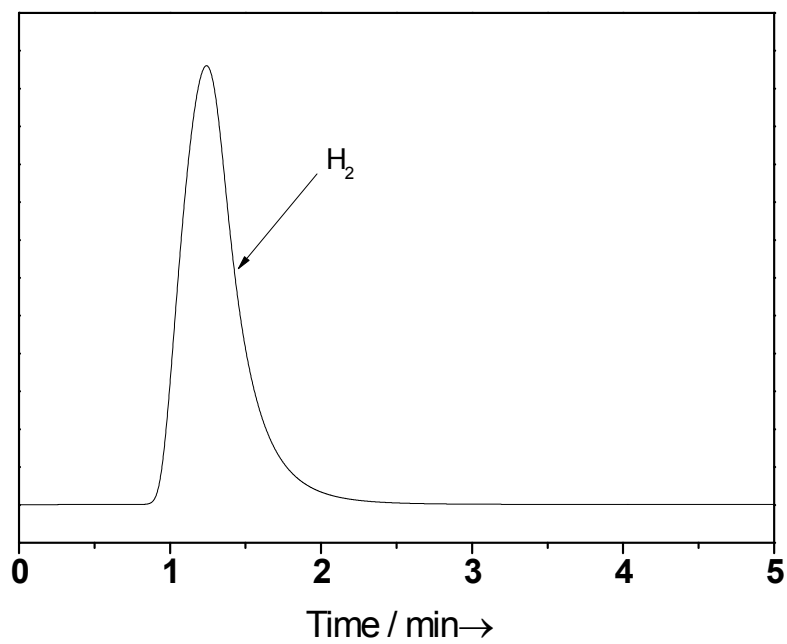

XVI.

**Figure S9** (a) GC spectrum using TCD for the gas generated from FA/SF solution (1.1 M FA, 4.0 M SF) and (b) magnified image

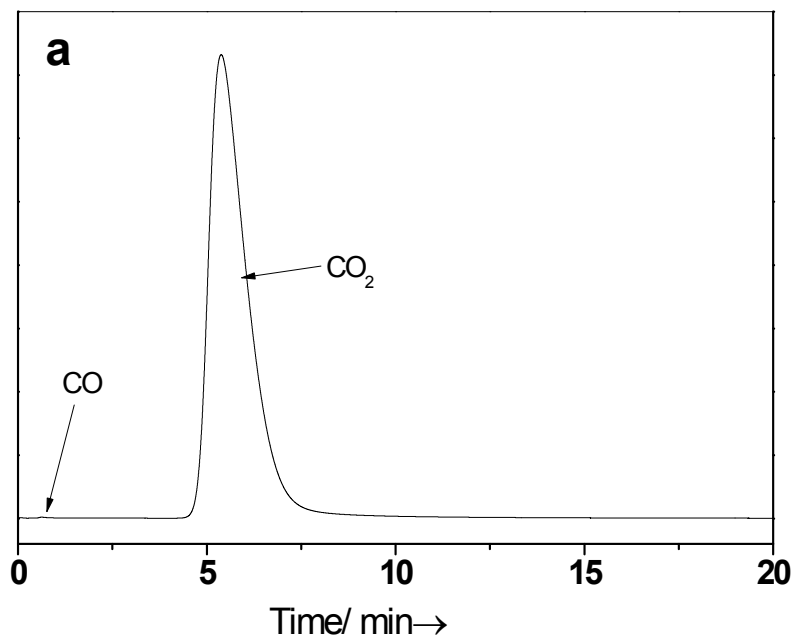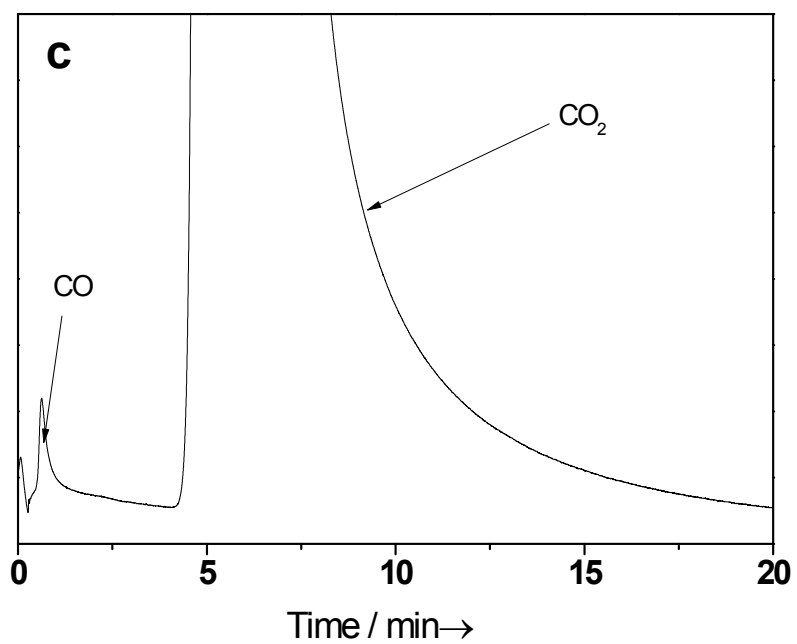

## XVII. The calculation of the initial TOF

The initial TOF in this research is calculated by following equation,

$$TOF_{initial} = \frac{p_{atm} V_{H_2}}{RT n_{Au + Pd} t}$$

Where  $p_{atm}$  is the pressure of atmosphere,  $V_{H_2}$  is the volume of hydrogen generated,  $T$  is the reaction temperature,  $n_{Au+Pd}$  is the total mole number of Au and Pd in the catalyst and  $t$  is reaction time (10 min).
